# Supplementary material
Source: Royal Society of Chemistry journal article supplement (doi:10.1039/d6fb00108d)
Supplement: d6fb00108d1.pdf [file d6fb00108d1.pdf]

Stream-Specific Functional and Rheological Variability in Roller-Milled Wheat Flours: A Sustainable Approach to Cookie Quality Optimization and Flour Utilization

Veeranna Hitlamani & Aashitosh A. Inamdar\*

Flour Milling Baking & Confectionery Technology Department, CSIR-Central Food Technological Research Institute, Mysuru, India-570020.

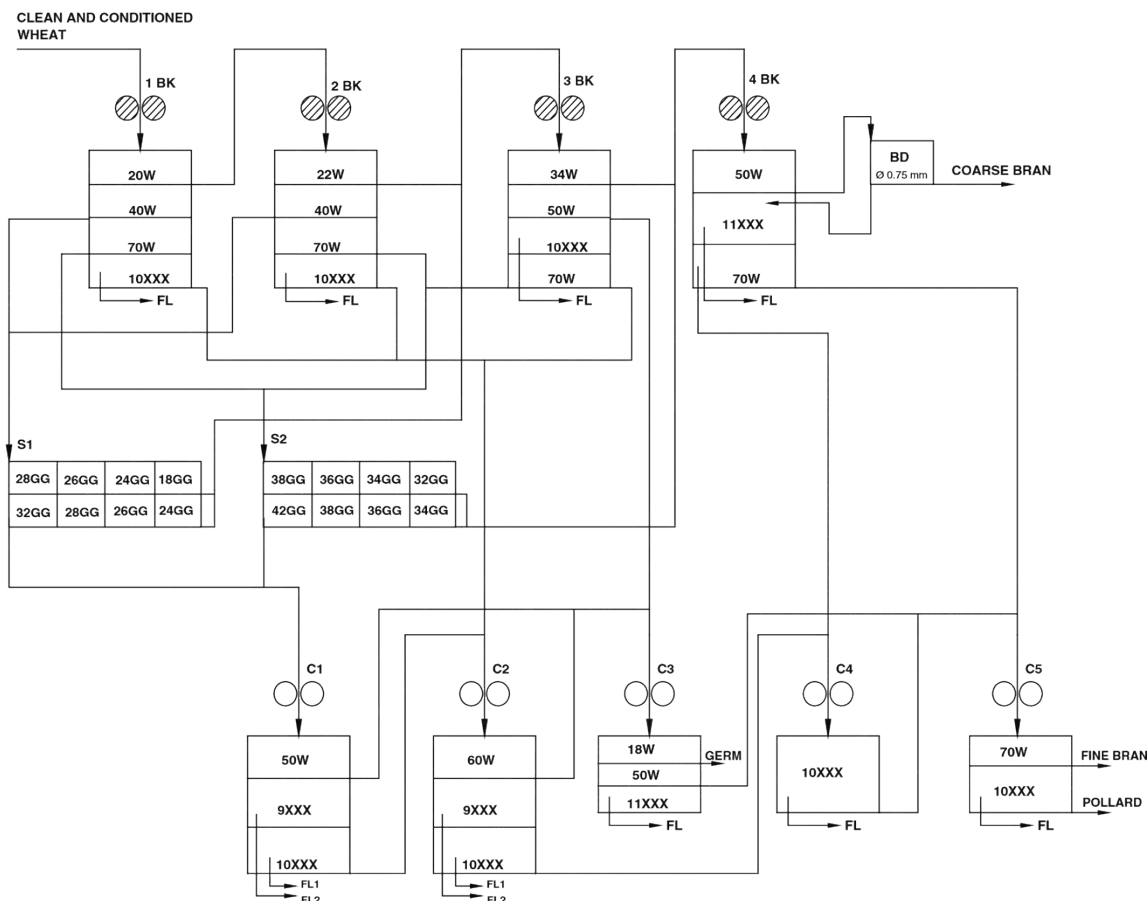

| Sieves W | Opening Micron | Sieves GG | Opening Micron | Sieves XXX | Opening Micron |
|----------|----------------|-----------|----------------|------------|----------------|
| 18W      | 1220           | 18GG      | 1180           | 9XXX       | 150            |
| 20W      | 1110           | 24GG      | 850            | 10XXX      | 132            |
| 22W      | 990            | 26GG      | 800            | 11XXX      | 118            |
| 34W      | 635            | 28GG      | 710            |            |                |
| 40W      | 525            | 32GG      | 600            |            |                |
| 50W      | 410            | 34GG      | 560            |            |                |
| 60W      | 310            | 36GG      | 530            |            |                |
| 70W      | 290            | 38GG      | 500            |            |                |
|          |                | 42GG      | 450            |            |                |

**SF. 1** Milling flow sheet of ISMT pilot plant. BK = Break, C = Reduction, S = Purifier, BD = Bran Duster, FL = Flour, W = Wire, GG = Grit Gauze, XXX = Flour Sieve.

BK = Break, C = Reduction, S = Purifier, BD = Bran Duster, FL = Flour, W = Wire, GG = Grit Gauze, XXX = Flour Sieve. Source: Sakhare & Inamdar, 2014

**Table 1: factor loadings for PC1 and PC2**

| Principal Component Number | Eigenvalues | PC 1         | PC 2         | PC 1         | PC 2         |                  |
|----------------------------|-------------|--------------|--------------|--------------|--------------|------------------|
|                            |             | 35.79%       | 20.96%       | 35.79%       | 20.96%       |                  |
| Eigenvalue                 | Eigenvalue  | Loading Plot     |
| 1                          | 10.38019315 | 0            | 0            | 0.08628231   | 0.302234235  | BG               |
| 2                          | 6.079249982 | 0            | 0            | 0.189778216  | 0.295487755  | Viscosity        |
| 3                          | 4.160774441 | 0            | 0            | 0.199457759  | 0.277344702  | HPV              |
| 4                          | 2.316856357 | 0            | 0            | 0.158742202  | 0.244743881  | CPV              |
| 5                          | 1.897739364 | 0            | 0            | 0.053180336  | 0.209607618  | BD               |
| 6                          | 1.638772228 | 0            | 0            | 0.125468997  | 0.22105218   | To               |
| 7                          | 0.947150886 | 0            | 0            | -0.127746    | 0.304702509  | Tp               |
| 8                          | 0.828452834 | 0            | 0            | 0.172096169  | 0.274973519  | Te               |
| 9                          | 0.50638811  | 0            | 0            | 0.159917538  | 0.218703617  | $\Delta H$ (J/g) |
| 10                         | 0.244422648 | 0            | 0            | 0.226291668  | 0.143755035  | WA               |
| 11                         | 4.44E-29    | 0            | 0            | 0.148226558  | 0.143553735  | DDT              |
|                            |             | 0            | 0            | 0.10291133   | 0.239309285  | DS               |
|                            |             | 0            | 0            | 0.225283897  | 0.062245286  | MTI              |
|                            |             | 0            | 0            | -0.22819051  | 0.035789049  | ZN               |
|                            |             | 0            | 0            | 0.178411293  | 0.225259782  | FN               |
|                            |             | 0            | 0            | 0.082542662  | 0.13270235   | SD               |
|                            |             | 0            | 0            | 0.264420462  | 0.12324776   | WHC              |
|                            |             | 0            | 0            | 0.190206216  | 0.176381212  | OHC              |
|                            |             | 0            | 0            | 0.182186618  | 0.182790591  | SP (55)          |
|                            |             | 0            | 0            | 0.110035381  | 0.038425848  | SP (75)          |
|                            |             | 0            | 0            | 0.171437741  | 0.116828943  | SP (98)          |
|                            |             | 0            | 0            | 0.216653411  | 0.136530658  | SI (55)          |
|                            |             | 0            | 0            | 0.183592543  | 0.023912729  | SI (75)          |
|                            |             | 0            | 0            | 0.092250969  | 0.180309232  | SI (98)          |
|                            |             | 0            | 0            | 0.199118802  | 0.136328218  | Dia (um)         |
|                            |             | 0            | 0            | 0.217610197  | 0.095776901  | Width            |
|                            |             | 0            | 0            | 0.260721266  | 0.104661664  | L*               |
|                            |             | 0            | 0            | 0.269448494  | 0.114131066  | a*               |
|                            |             | 0            | 0            | 0.280564396  | 0.071323289  | b*               |
